# Supplementary material
Source: Springer Nature journal article supplement (https://www.springermedizin.de/resource/supplementary/12990_2012_507_MOESM7_ESM.pdf/9613448)

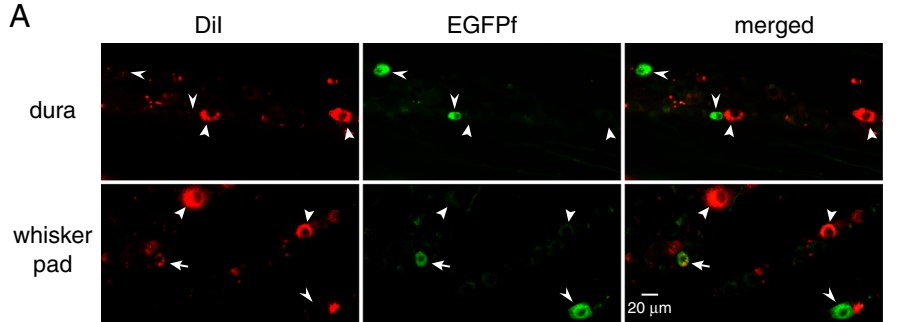

**B.** the abundance of EGFPf<sup>+</sup> neurons

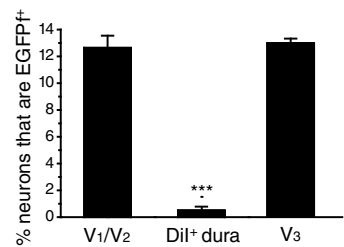

**C.** the distribution of EGFPf<sup>+</sup> neurons in TG subdivisions

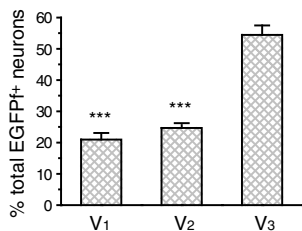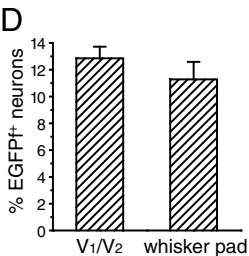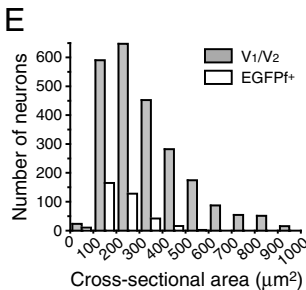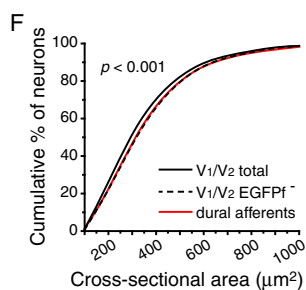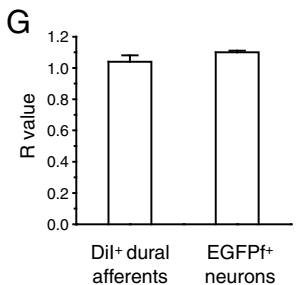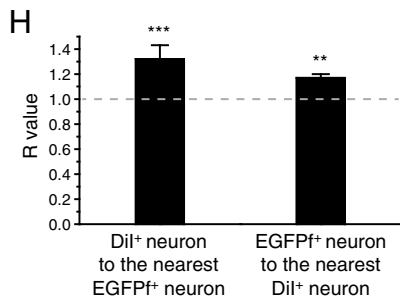

Supplement: MOESM7 [file 9613448]
